# Supplementary material for: Highly active horseradish peroxidase immobilized in 1-butyl-3-methylimidazolium tetrafluoroborate room-temperature ionic liquid based sol–gel host materials
Source: Royal Society of Chemistry journal article supplement (doi:10.1039/b417680d), 2005-01-01
Supplement: b417680d.pdf [file b417680d.pdf]

# **Highly Active Horseradish Peroxidase Immobilized in 1-Butyl-3-methylimidazolium Tetrafluoroborate Room-Temperature Ionic Liquid based Sol-Gel Host Materials**

**Yang Liu<sup>a, b</sup>, Meijia Wang<sup>a</sup>, Jun Li<sup>b</sup>, Zhiying Li<sup>a</sup>, Ping He<sup>a</sup>, Hongtao Liu<sup>a</sup> and  
Jinghong Li<sup>\*a, b</sup>**

## **EIS**

### **Experimental details**

#### **Chemicals**

BMIM<sup>+</sup>BF<sub>4</sub><sup>-</sup> was purchased from Acros Organics and was dried in vacuum at 60 °C for 24 h. Horseradish peroxidase (HRP, RZ≈3.0, 250 U mg<sup>-1</sup>) was purchased from BioBasic Incorporation. Tetraethyl orthosilicate (TEOS) was obtained from Sigma (≥ 99%). Guaiacol (≥ 99%, chemical purity) was purchased from Shanghai Chemical Reagent Corporation. HCl, H<sub>2</sub>O<sub>2</sub> (33%) and sodium phosphates were chemical purity and purchased from Beijing Chemical Reagent Corporation. H<sub>2</sub>O<sub>2</sub> was titrated by KMnO<sub>4</sub> before the activity assay. All the reagents and chemicals were used as received without further purification.

#### **Preparation of HRP-IL@GEL**

To synthesis the sol containing BMIM<sup>+</sup>BF<sub>4</sub><sup>-</sup>, 2 ml of TEOS, 1 ml of H<sub>2</sub>O, 0.05 ml of 0.1 M HCl and 1 ml BMIM<sup>+</sup>BF<sub>4</sub><sup>-</sup> were mixed in a beaker under magnetic stirring at room temperature. After 3 h, a homogenous sol was gotten. The gels were produced

by adding 0.4 ml of 2 mg/ml HRP (in 0.025 M phosphate buffer, pH 6.86) in 0.4 ml of sols with or without IL. The mixtures were sealed with paraffin film and placed at room temperature until gelation occurred. After 6 h, the film was pinned with many holes to evaporate the solvents and byproducts in the sol-gel reaction. The samples were put in vacuum oven and evacuated for over 3 days until a constant weight was gotten and no weight lost was observed below 100 °C in TGA spectra (Fig. S2). 0.1 g (without IL) and 0.19 g (IL) transparent monoliths were obtained respectively. No crack was found in the HRP-IL@GEL, on the contrary there were obvious cracks in HRP@GEL. The IL based silica gel was promised to be a good matrix of sensor. The dry gels were crushed into fine powders with a mortar and stored in refrigerator.

### **Characterization**

TGA was carried out using a Perkin-Elmer 7 series TGA system. Measurements were conducted by heating the sample from 20 °C to 700 °C at a heating rate of 10 °C/min under air atmosphere.

FT-IR was conducted using a FTS135 infrared spectroscope (BIO-RAD, USA). FT-IR spectra (4000-450  $\text{cm}^{-1}$ ) of both as-synthesized and calcined samples were obtained by forming thin transparent KBr pellet containing the samples. Two typical peaks at  $\sim 1107 \text{ cm}^{-1}$  (\*) and  $815 \text{ cm}^{-1}$  (+) in the infrared spectra of both as-synthesized and calcined gels, corresponding to Si-O-Si asymmetric stretching vibration and O-Si-O vibration respectively, indicated the formation of  $\text{SiO}_2$  framework.

SEM measurements were made on a XL30 ESEM FEG scanning electron microscopy

at an accelerating voltage of 20 KV. The TEM graph and diffraction pattern were taken with a JEOL-JEM-2010 operating at 200 kV (JEOL, Japan). Samples for TEM were prepared by dropping a diluted suspension of silica powder onto a standard carbon-coated (20-30 nm) formvar film on a copper grid (230 mesh).

BET surface and pore volume were measured on a Quantachrome NOVA 1000 Ver. 6.11 system at 77.4 K. All samples were first degassed in a vacuum at 200 °C for 2 h before analysis. The BET specific area was calculated from the nitrogen adsorption data in the relative pressure range from 0.01 to 0.3. The total volume was estimated from the amount adsorbed at a relative pressure of about 0.99. The average BJH pore diameter was calculated by using a NOVA Enhanced Data Reduction Software (Ver. 2.13)

UV-vis experiments were performed with a Cary 500 UV-vis spectrophotometer (VARIAN, USA).

#### **Activity assay of immobilized HRP**

In a general procedure, an exact amount of sample powders (3 mg of HRP@GEL, and 5.7 mg of HRP-IL@GEL, each containing  $2.4 \times 10^{-2}$  mg HRP) was weighed in a tube, then phosphate buffer (pH 6.86) was added to wash the samples at a vibrator. After 1 h, the washing solution was separated by decantation after centrifugation. The activity assay for the immobilized HRP was performed by measuring the initial oxidation rate of guaiacol with H<sub>2</sub>O<sub>2</sub>. The initial rate was obtained by measuring the absorbance changes at 470 nm of the maximum absorbance of the oxidation product of

guaiacol and the absorption coefficient of the oxidation product was  $2.66 \times 10^4 \text{ M}^{-1} \text{ cm}^{-1}$ .

For the measurements of  $K_M$  and  $k_{\text{cat}}$ , constant amount of  $\text{H}_2\text{O}_2$  (1.5 mM of final concentration) was added in a 1 cm photo-path length quartz cell with quantitative immobilized HRP and fixed concentration of substrate to a constant volume of solution (3 mL) in 0.025 M phosphate buffer (pH 6.86).

Before the addition of  $\text{H}_2\text{O}_2$ , the mixed solution was allowed to be equilibration for 15 min. The absorbance was scanned from 350 nm to 700 nm for 60 min with the interval of 2 min. For the assays of immobilized HRP, the initial rate of product formation ( $V_0$ ) was evaluated from the points after 10 min where a linear relationship was gotten.

The  $K_M$  was calculated by constructing double reciprocal plots (Lineweaver-Burk equation) relating  $V_0^{-1}$  to  $S^{-1}$  ([substrate concentration] $^{-1}$ ), and fitting these to a linear model.  $k_{\text{cat}}$  was calculated by followed equation:

$$k_{\text{cat}} = V_{\text{max}} / [\text{E}]_{\text{tol}}$$

$V_{\text{max}}$  is the maximum velocity of the enzyme reaction, which can be obtained from Michealis-Menten equation.  $[\text{E}]_{\text{tol}}$  was the concentration of HRP in the reaction solution.

Thermal stability of the encapsulated HRP was examined from the retaining activities after the treatments at each temperature for 30 min, in comparison with the activities of the samples without the thermal treatment. The activity assay was the same as before.

Fig. S1 The IR image of the as-synthesized (a) and the calcined (b) HRP-IL@GEL.

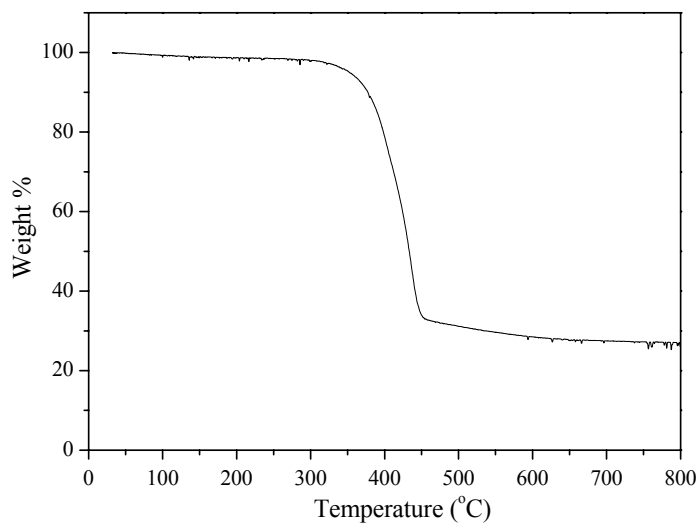

Fig. S2 The TGA of the as-synthesized HRP-IL@GEL.

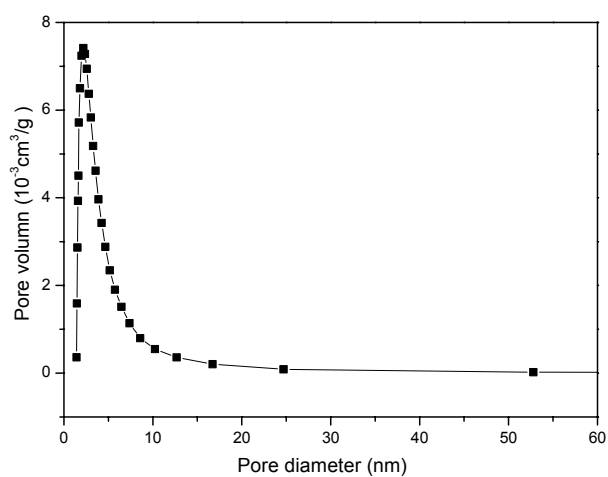

Fig. S3 The BJH desorption pore size distribution of the HRP-IL@GEL matrix after calcination.
